**Title:**

**Investigation of Dengue Fever Outbreak in a Rural Area of Islamabad, Pakistan: A Case Control Study**

**Authors:**

Fawad Khalid Khan, Khurram Shahzad Akram, Ambreen Chaudhry, Mir Hassan Bullo, Zakir Hussain, Mirza Amir Baig, Amjad Mehmood, Zeeshan Iqbal Baig

**Affiliation:**

Field Epidemiology and Laboratory Training Program of Pakistan

**Corresponding author:**

Ambreen Chaudhry, Epidemiologist

Field Epidemiology and Laboratory Training Program of Pakistan

Park Road chak Shehzad, Islamabad (44000), Pakistan

Email: [ambr.chaudhry@gmail.com](mailto:ambr.chaudhry@gmail.com)

Phone: +92 333 9949969

## **Abstract:**

**Background:** In the second week of October 2019, five suspected cases of dengue fever were reported from union council Sohan, Islamabad rural (population 45,747) to the health department, Islamabad Capital Territory (ICT). Outbreak investigation was conducted with the objectives to identify risk factors and recommend control measures.

**Methods:** Outbreak investigation was conducted from 17<sup>th</sup> October to 25<sup>th</sup> November 2019. A case was defined as, “fever and two or more of the following signs/symptoms; headache, retro-orbital pain, joint/bone pain, myalgia and petechial rash with NS1 test (Nonstructural Protein 1) positive during 8<sup>th</sup> October to 25<sup>th</sup> November 2019 among residents of Sohan”. Age and sex-matched controls were recruited from the same neighborhood. All cases were positive for NS1 antigen. Blood samples from five suspected cases were collected and tested for laboratory confirmation.

**Results:** A total of 547 households were surveyed and 85 cases were identified. The mean age was 34.4 years + 16.05 (range 3-71 years). The attack rate was 0.19% whereas the most affected age group was the 45-54 years (AR 0.43%). Males were predominantly affected (n=48 56.5%). Among all cases, 32% (n=27) had stagnant water inside or around their houses (aOR 2.65, CI 1.20-5.83,  $P=0.005$ ), 33% (n=28) were using mosquito repellent (aOR 0.35, CI 0.17-0.70,  $P<0.001$ ), 31% (n=26) used indoor residual spray insecticide (aOR 0.48, CI 0.24-0.97,  $P=0.041$ ), and 73% (n=62) used full protective clothing (aOR 0.17, CI 0.05-0.58,  $P<0.001$ ). All five blood samples were tested positive for NS-1 antigen.

**Conclusion:** The presence of accumulated rainwater in pools and empty receptacles around houses acted as breeding grounds for *Aedes aegypti* mosquitos and was the most probable cause of this outbreak. Following our recommendations, the health department-initiated mosquito breeding sites control activities through residual insecticide spray and advocacy on the use of protective measures against mosquito bites.

**Keywords:**

**Word count: 297**

## **Introduction**

Dengue Fever (DF) is a vector-borne illness caused by dengue virus which is transmitted to humans through mosquito *Aedes Aegypti* and *Aedes Albopictus*. This mosquito also transmits other infections like chikungunya, yellow fever and zika virus infection. Dengue Virus (DENV) is a single stranded RNA virus that has four serotypes, DEN1, DEN2, DEN3, and DEN4.<sup>1</sup> Infection with one DENV serotype confers the life time immunity to the individual but reinfection with another serotype can cause a severe infection leading to hemorrhagic fever and shock syndrome. Presence of all four DENV serotypes have been reported in Pakistan with most prevalent serotypes DEN2 and DEN3.<sup>2 3</sup> Individual with classical DF presents clinically with fever, nausea, vomiting, headache, retro-orbital pain, muscle or joint/bone pain and rash.<sup>4</sup> Dengue Fever affects both genders, males are predominantly involved.<sup>5</sup> Epidemics similar to these symptoms have been documented in the past occurred in the 17<sup>th</sup> century in West Indies and Central America.<sup>6</sup> Globally about 50% of population is at risk of DF.<sup>7</sup> Recent estimate indicates 50-100 million cases of dengue fever and 250000-500000 cases of DHF occur every year worldwide.<sup>8</sup> Asia, Africa and America contribute 70 percent, 16 percent and 14 percent of this burden respectively.<sup>9</sup> First outbreak of DF in Pakistan was reported in 1994 followed by occurrence of many outbreaks in different cities during last decade.<sup>10</sup> DF is now widely prevalent and endemic in Pakistan including capital city Islamabad.<sup>11</sup> Dengue endemic countries have risk of recurrent DF outbreaks.<sup>12</sup> Major contributing factors include overcrowding/increased population, poor sanitization, unplanned urbanization and international travel and trade.<sup>13</sup> Monsoon rainy season resulting in floods and accumulation of rain water in pools and empty receptacles also contribute to provide breeding sites for the vector.<sup>14</sup> Humid and warm environment provide breeding opportunities for the mosquitoes<sup>15</sup>. Most dengue outbreaks are reported during rainy season.<sup>16</sup> Dengue prevention and control measures include vector control (elimination of mosquito breeding sites, insecticide residual spray and thermal fogging) and prevention of mosquito bites (health education of community).

## **Background**

Lady health workers reported 14 suspected cases of dengue fever from UC Sohan, Islamabad (a rural UC with a population of 45,747 individuals) to the health department, Islamabad capital territory (ICT) during the second week of October (14<sup>th</sup> October) 2019. On 17<sup>th</sup> October 2019,

after confirmation of outbreak, on the directive of DHO, FELTP fellow from Federal disease surveillance and response unit (FDSRU) was deputed to conduct the field investigation with the objectives to confirm outbreak, identify possible risk factors and to recommend control measures.

## **Methods**

Outbreak investigation was conducted from 17<sup>th</sup> October to 25<sup>th</sup> November 2019. FELTP-Fellow visited the area and Dengue cases were identified through door-door active case search. A working case definition was developed which was sudden onset of fever ( $> 38^{\circ}\text{C}$ ) in a resident of union council Sohan, between October 8 to November 25, 2019, with two or more of the following signs/symptoms: headache, retro-orbital pain, arthralgia, myalgia, petechial rash with positive NS1 (Non-structural Protein-1) antigen detection in serum.

After taking an Institutional Review Board permission from The Federal General Hospital Islamabad was obtain vide number: F-3-144/ADMN-EC-FGH. An informed written consent was administered to the literate respondents while a translation was read to the illiterate and guardians/parents of the minors declaring their autonomy, beneficence and justice rendered to them. A pretested, structured questionnaire was used to collect the information on demographics, date of onset of illness, sign/symptoms, risk factors information like use of mosquito coil, repellent lotion, protective full clothing, insecticide sprays, screening of doors, stagnant water around house, presence of water spots inside house (flower pots, open containers with water, water pools, old tires) and travel outside union council 15 days prior to illness and a line list was developed. All identified cases were NS1 positive from different hospitals and laboratories. Blood samples (5ml each) from five suspected cases having fever were collected according to the guidelines set by Public Health laboratory Division, National Institute of health Pakistan and sent for laboratory confirmation. Age and sex matched controls (n=85) were selected for comparison from same area with a 1:1 ratio.

## **Results:**

During the active case search 547 permanent houses and temporary huts (Punjabi Jungian) in UC Sohan were surveyed from 17 October to 25 November, 2019 and total 85 cases (71 cases identified through active case search) of acute dengue fever were identified and interviewed.

The Epi curve showed that the first case had date of onset of illness on 10th October, 2019 and most of the cases developed sign/symptoms on 13th October (n=8), 1<sup>st</sup> and 4<sup>th</sup> Nov (n=5) and 2<sup>nd</sup> and 10<sup>th</sup> November (n=4) (**Figure 1**).

The most frequent sign/symptoms were; Fever 100.00% (n= 85), Headache 83.53% (n=71), Joint/bone pain 75.29% (n= 64), Myalgia 61.18% (n=52), Nausea/Vomiting 49.41% (n=42), Retro-orbital Pain 43.53 % (n= 37) and Abdominal Pain 32.94% (n=28).

Majority (56.5%) of the cases were males (n=48). 35.3% (n=30) of cases were uneducated. Majority 87% (n=74) of the cases said they were using full protective clothing. 81% (n=69) were using mosquito coils/mats in their home. 34% (n=29) cases said they used repellent lotion for mosquito bite prevention. Use of insecticide repellent and door screening is 31% (n=26) and 40% (n=34) respectively. Only 5.8% (n=5) cases used bed nets.

Stagnant water was present around 31.7% (n=27) cases. 65% (n=55) cases had general cleanliness around houses. 4 cases (4.7%) cases said they have old tires on their roof. Presence of water flower pots and open water containers was only 2.35% (n=2). None of the cases have water pool inside their home. (**Table 1**).

Mean age of the cases was 34.4 years + 16.05 (range 3-71 years). Most common age group with highest attack rates were 45-54 years (AR=0.43%), 25-34 years (AR=0.34%) and 35-44 years (AR=0.31%). Overall attack rate was 0.19%. (**Table 2**)

#### **Epi curve with information on rain and temperature plots:**

Meteorological investigation showed that rain (99 mm) was observed on 1<sup>st</sup> September with two showers in the second week of September.

Vector breeding might have started after September 1<sup>st</sup> rain and the first brood of vector was ready by 10<sup>th</sup> October. Department of health initiated mosquito breeding site control activities through IRS, thermal fogging and awareness campaign through Lady Health Workers (frontline workers). (**Figure 2**)

#### **Univariate Analysis:**

Univariate analysis showed the accumulation of rain water around houses (OR 3.90, CI 1.91-7.99,  $P<0.00$ ) is associated with the dengue fever, while use of repellent (OR 0.34, CI 0.18-0.64,  $P<0.00$ ), insecticide spray (OR 0.36, CI 0.19-0.67,  $P<0.001$ ) and full protective clothing (OR 0.13, CI 0.04-0.40,  $P<0.00$ ) has a protective effect. (**Table 3**).

### **Multivariate Analysis:**

Multivariate Analysis shows that accumulation of accumulated rain water around houses (OR 2.65, CI 1.2-5.83,  $P<0.01$ ) is associated with the dengue fever, while use of repellent (OR 0.35, CI 0.17-0.70,  $P<0.00$ ), insecticide spray (OR 0.48, CI 0.24-0.97,  $P<0.041$ ) and full protective clothing (OR 0.17, CI 0.05-0.58,  $P<0.00$ ) has a protective effect. (**Table 4**).

### **Laboratory analysis:**

Five (05) blood samples taken from acutely ill cases and all were tested positive for dengue fever (NS1 Positive).

**Discussion:** Dengue Fever is a significant public health problem which is more common in developing countries. In recent years Pakistan has experienced multiple dengue outbreaks from different geographical areas. This dengue outbreak from union council Sohan was the first ever reported outbreak from this area. Dengue cases were limited to close proximity. Since 1994, several outbreaks have been reported in Pakistan.<sup>17</sup> Most of the cases reported in this outbreak were males as shown by Khan J.<sup>18</sup> Males were predominantly involved due to use of non-protective clothing. Most common affected age group with highest attack rates was 45-54 years as shown by Khan J. Most common symptoms were fever and headache followed by joint/bone pains and myalgia. Impaired consciousness was the rarest among all symptoms. There was statistically significant association with accumulated rain water in pools and empty receptacles around houses (p value  $<0.00$ ) which became breeding sites for mosquito. Insecticide (p value  $<0.00$ ), repellent (p value  $<0.00$ ) and full protective clothing (p value  $<0.00$ ) had a protective effect. This outbreak investigation revealed that protective measures against the vector were not commonly practiced. For the diagnostic purpose NS1 (Non-structural Protein-1) antigen detection test was used as a prime investigation.

### **Conclusions:**

Presence of accumulated rain water in pools and empty receptacles around houses provided breeding site for mosquitos and was the most probable cause of this outbreak. Protective measures against the vector were not commonly practiced. Recommendations were also given regarding Health education of the residents of UC Sohan regarding eliminating the mosquito breeding sites by filling the ponds of accumulated rain water and awareness campaigns for use of repellent, insecticide spray and full protective clothing was recommended. District health

department was recommended initiate larvicidal and insecticidal residual spray activities and to strengthen dengue surveillance system.

**Impact of this outbreak investigation:** After recommendations, the health department initiated mosquito breeding sites control activities through residual insecticide spray and advocacy on use of protective measures against mosquito bites. Dengue surveillance system was established. No outbreak has been reported since then.

## References:

- <sup>1</sup> Sujitha V, Murugan K, Paulpandi M, Panneerselvam C, Suresh U, Roni M, Nicoletti M, Higuchi A, Madhiyazhagan P, Subramaniam J, Dinesh D. Green-synthesized silver nanoparticles as a novel control tool against dengue virus (DEN-2) and its primary vector *Aedes aegypti*. *Parasitology research*. 2015 Sep 1;114(9):3315-25.
- <sup>2</sup> Fatima Z, Afzal S, Idrees M, Rafique S, Akram M, Khubaib B, Saleem S, Amin I, Shahid M. Change in demographic pattern of dengue virus infection: evidence from 2011 dengue outbreak in Punjab, Pakistan. *Public health*. 2013 Sep 1;127(9):875-7.
- <sup>3</sup> Khan J, Khan A. Incidence of dengue in 2013: dengue outbreak in District Swat, Khyber Pakhtunkhwa, Pakistan. *Inter J of Fauna and Biolo Stud*. 2015;2(1):1-7.
- <sup>4</sup> Dellamonica P. Dengue fever: clinical features. *Archives de pediatrie: organe officiel de la Societe francaise de pediatrie*. 2009 Oct;16:S80-4.
- <sup>5</sup> Ali A, ur Rehman H, Nisar M, Rafique S, Ali S, Hussain A, Idrees M, Sabri S, Zada H, Hussain S. Seroepidemiology of dengue fever in Khyber Pakhtunkhawa, Pakistan. *International Journal of Infectious Diseases*. 2013 Jul 31;17(7):e518-23
- <sup>6</sup> Murray NE, Quam MB, Wilder-Smith A. Epidemiology of dengue: past, present and future prospects. *Clinical epidemiology*. 2013;5:299.
- <sup>7</sup> World Health Organization Fact sheet. *Dengue and severe dengue*. <http://www.who.int/mediacentre/factsheets/fs117/en/> (accessed 28 July 2017)
- <sup>8</sup> Ali A, ur Rehman H, Nisar M, Rafique S, Ali S, Hussain A, Idrees M, Sabri S, Zada H, Hussain S. Seroepidemiology of dengue fever in Khyber Pakhtunkhawa, Pakistan. *International Journal of Infectious Diseases*. 2013 Jul 31;17(7):e518-23.
- <sup>9</sup> Bhatt S, Gething PW, Brady OJ, Messina JP, Farlow AW, Moyes CL, Drake JM, Brownstein JS, Hoen AG, Sankoh O, Myers MF. The global distribution and burden of dengue. *Nature*. 2013 Apr 25;496(7446):504.
- <sup>8</sup> Umair M. Preliminary Seroepidemiological survey of dengue infections in Pakistan, 2009-2014. *Infectious diseases of poverty*. 2017 Mar 9;6(1):48.
- <sup>11</sup> Wesolowski A, Qureshi T, Boni MF, Sundsøy PR, Johansson MA, Rasheed SB, Engø-Monsen K, Buckee CO. Impact of human mobility on the emergence of dengue epidemics in Pakistan. *Proceedings of the National Academy of Sciences*. 2015 Sep 22;112(38):11887-92.
- <sup>12</sup> Lee JS, Carabali M, Lim JK, Herrera VM, Park IY, Villar L, Farlow A. Early warning signal for dengue outbreaks and identification of high risk areas for dengue fever in Colombia using climate and non-climate datasets. *BMC Infectious Diseases*. 2017 Jul 10;17(1):480.
- <sup>13</sup> Abbasi A. Dengue Fever: A Statistical Analysis Regarding Awareness about Dengue among University Students in Azad Kashmir. *Journal of Healthcare Communications*. 2016 Dec 12;2(1).

---

<sup>14</sup> Ahmed I, Raza FA, Iqbal M, Ashraf M. Dengue virus serotypes and epidemiological features of dengue fever in Faisalabad, Pakistan. *Tropical Biomedicine*. 2017 Dec 1;34(4):928-35.

<sup>15</sup> Getachew D, Tekie H, Gebre-Michael T, Balkew M, Mesfin A. Breeding sites of *Aedes aegypti*: potential dengue vectors in Dire Dawa, East Ethiopia. *Interdisciplinary perspectives on infectious diseases*. 2015;2015.

<sup>16</sup> Khan J, Khan A. Incidence of dengue in 2013: dengue outbreak in District Swat, Khyber Pakhtunkhwa, Pakistan. *Inter J of Fauna and Biolo Stud*. 2015;2(1):1-7.

<sup>17</sup> Hayes CG, Baqar S, Ahmed T, Chowdhry MA, Reisen WK. West Nile virus in Pakistan. 1. Sero-epidemiological studies in Punjab Province. *Transactions of the Royal Society of Tropical Medicine and Hygiene*. 1982 Jan 1;76(4):431-6.

<sup>18</sup> Khan J, Khan A. Incidence of dengue in 2013: dengue outbreak in District Swat, Khyber Pakhtunkhwa, Pakistan. *Inter J of Fauna and Biolo Stud*. 2015;2(1):1-7.



**Figure 1:** Epi curve – No. of cases by the date of onset of illness, union council Sohan Islamabad October-November 2019

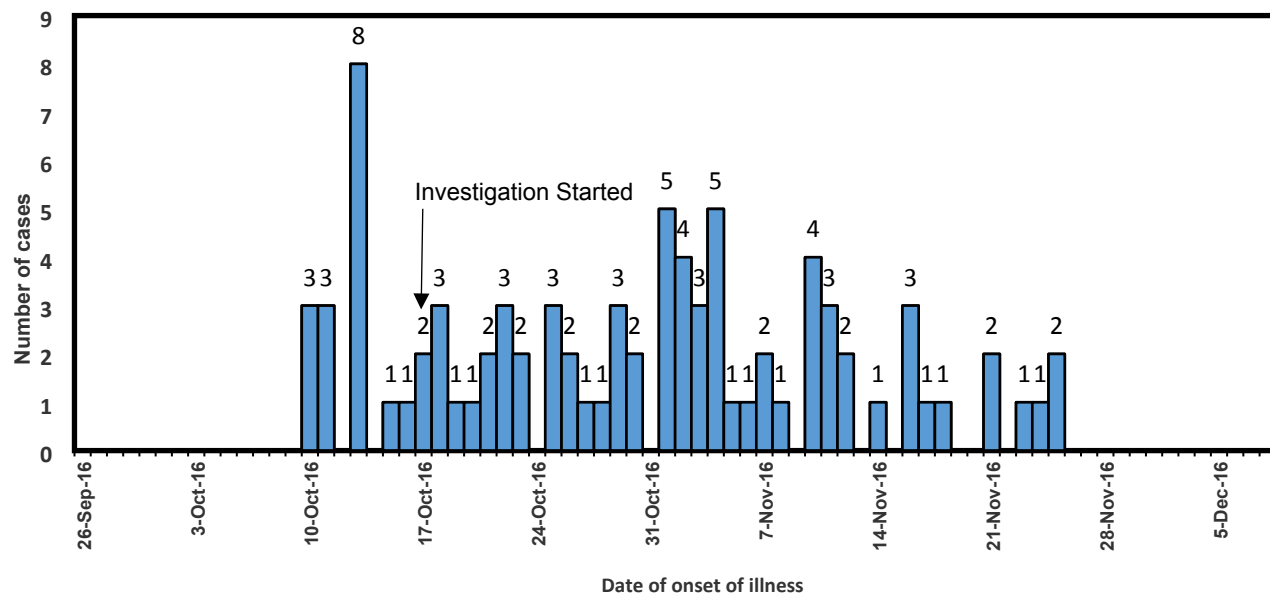

**Figure 2:** Epi curve with information on rain and temperature plots union council Sohan Islamabad October-November 2019

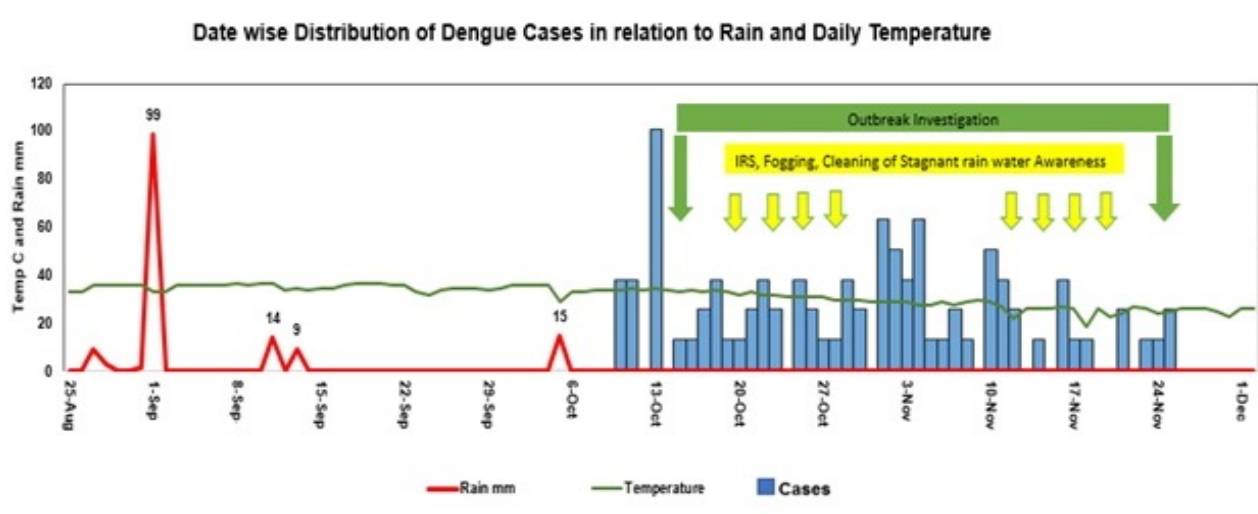

**Table 1: Summary statistics of dengue fever cases, Sohan, Islamabad (n=85) October-November 2019**

| <b>Signs and symptoms</b>        | <b>No. of cases (n=85)</b> | <b>Percentage</b> |
|----------------------------------|----------------------------|-------------------|
| Fever                            | 85                         | 100.00 %          |
| Headache                         | 71                         | 83.53 %           |
| Joint/bone Pain                  | 64                         | 75.29 %           |
| Myalgia                          | 52                         | 61.18 %           |
| Nausea/Vomiting                  | 42                         | 49.41 %           |
| Retro-orbital Pain               | 37                         | 43.53%            |
| Abdominal Pain                   | 28                         | 32.94 %           |
| Petechiae                        | 13                         | 15.29 %           |
| Rash                             | 21                         | 24.71 %           |
| Mucosal Bleeding                 | 14                         | 16.47 %           |
| Impaired Consciousness           | 03                         | 3.53 %            |
| <b>Sex Distribution</b>          |                            |                   |
| Male                             | 48                         | 56.5 %            |
| Female                           | 37                         | 43.5 %            |
| <b>Level of Education</b>        |                            |                   |
| Uneducated                       | 30                         | 35.3 %            |
| Primary or more                  | 55                         | 64.7 %            |
| <b>Preventive Measures</b>       |                            |                   |
| Full Protective clothing         | 74                         | 87%               |
| Use of mosquito Coil/Mat         | 69                         | 81%               |
| Door screening                   | 34                         | 40%               |
| Use of repellent lotion          | 29                         | 34%               |
| Insecticide spray                | 26                         | 31%               |
| Use of bed nets                  | 05                         | 5.8%              |
| <b>Risk Factors</b>              |                            |                   |
| General Cleanliness around house | 55                         | 65%               |
| Stagnant Water around house      | 27                         | 31.7%             |
| Travel History (outside Sohan)   | 20                         | 24%               |
| Old Tyres                        | 4                          | 4.7%              |
| Flower Pots                      | 2                          | 2.35%             |
| Open containers of water         | 2                          | 2.35%             |
| Water Pool                       | 0                          | 0%                |
| H/O blood donation/receiving     | 0                          | 0%                |

---

**Table 2: Age specific attack rates of among the dengue fever cases, Sohan Islamabad, October-November 2019**

---

| <b>Age groups</b> | <b>No. of cases<br/>(n=85)</b> | <b>UC Sohan Population<br/>(45747)</b> | <b>Overall<br/>Attack Rate<br/>(0.19 %)</b> |
|-------------------|--------------------------------|----------------------------------------|---------------------------------------------|
| Under 5 years     | 1                              | 6176                                   | 0.02 %                                      |
| 5-14 years        | 4                              | 11,688                                 | 0.03 %                                      |
| 15-24 years       | 21                             | 9584                                   | 0.22 %                                      |
| 25-34 years       | 22                             | 6450                                   | 0.34 %                                      |
| 35-44 years       | 14                             | 4506                                   | 0.31 %                                      |
| 45-54 years       | 13                             | 3042                                   | 0.43 %                                      |
| > 55 years        | 10                             | 4301                                   | 0.23 %                                      |
| <b>Total</b>      | <b>85</b>                      | <b>45,747</b>                          | <b>0.19 %</b>                               |

---

---

**Table 3: Univariate analysis of risk factors associated with Dengue fever in Islamabad, October-November 2019**

---

| <b>Risk Factor</b>        | <b>Cases</b> | <b>Controls</b> | <b>Odds Ratio</b> | <b>95% Confidence Interval</b> | <b>p-value</b> |
|---------------------------|--------------|-----------------|-------------------|--------------------------------|----------------|
| Accumulated rain<br>Water | 37           | 14              | 3.90              | 1.91-7.99                      | 0.000          |
| Insecticide Spray         | 26           | 47              | 0.36              | 0.19-0.67                      | 0.001          |
| Repellent                 | 28           | 50              | 0.34              | 0.18-0.64                      | 0.000          |
| Full Protective Clothing  | 62           | 81              | 0.13              | 0.04-0.40                      | 0.000          |

---

**Table 4: Multivariate analysis of risk factors associated with Dengue fever in Islamabad  
October-November 2019**

| <b>Risk Factor</b>       | <b>Odds Ratio</b> | <b>95% Confidence Interval</b> | <b>p-value</b> |
|--------------------------|-------------------|--------------------------------|----------------|
| Accumulated rain water   | 2.7               | 1.20-5.83                      | 0.012          |
| Insecticide spray        | 0.5               | 0.24-0.97                      | 0.041          |
| Repellent lotion         | 0.4               | 0.18-0.70                      | 0.003          |
| Full Protective Clothing | 0.2               | 0.05-0.58                      | 0.005          |
